# Supplementary material for: Efficacy of One-Year Treatment with Aflibercept for Diabetic Macular Edema with Practical Protocol
Source: Hindawi journal article supplement (doi:10.1155/2017/7879691), 2017-01-01
Supplement: f1 [file 7879691.f1.pdf]

| sex    | age | right/left | IVA injection time | history of IVR/IVB | 0 M logMAR BCVA | 1Y changes of logMAR BCVA | 0 M CMT | 1Y changes of CMT | SRD | EZ | history of PC | history of STTA | cataract/IOL | Additional treatment |
|--------|-----|------------|--------------------|--------------------|-----------------|---------------------------|---------|-------------------|-----|----|---------------|-----------------|--------------|----------------------|
| female | 66  | right      | 1                  | IVR 1 time         | 0.301029996     | 0                         | 297     | 187               | +   | +  | +             | +               | cat          | -                    |
| female | 66  | left       | 8                  | IVR 3 times        | 1               | -0.301029996              | 629     | -325              | +   | +  | +             | +               | cat          | -                    |
| female | 52  | right      | 3                  | IVR 3 times        | 0.397940009     | 0.425968732               | 561     | 162               | +   | -  | +             | +               | cat          | PC                   |
| male   | 42  | left       | 12                 | IVR 9 times        | 0.698970004     | -0.602059991              | 400     | -84               | +   | -  | -             | +               | clear        | -                    |
| female | 75  | right      | 3                  | IVR 1 time         | 0.823908741     | -0.124938737              | 560     | -168              | +   | -  | +             | +               | IOL          | STTA                 |
| female | 67  | left       | 7                  | IVR 3 times        | 0.522878745     | -0.301029996              | 491     | 143               | +   | -  | +             | +               | IOL          | -                    |
| female | 64  | left       | 1                  | IVR 2 times        | 1.301029996     | -0.477121255              | 788     | -147              | +   | -  | +             | +               | cat          | -                    |
| male   | 61  | right      | 4                  | IVR 2 times        | 0.301029996     | -0.079181246              | 532     | -245              | +   | -  | +             | +               | cat          | -                    |
| male   | 52  | right      | 4                  | IVR 1 time         | 0.15490196      | -0.15490196               | 551     | -159              | +   | +  | -             | -               | cat          | -                    |
| female | 54  | left       | 5                  | IVB 6 times        | 1               | -0.301029996              | 646     | -438              | +   | -  | +             | +               | cat          | -                    |
| male   | 70  | right      | 3                  | -                  | 0.397940009     | -0.301029996              | 570     | -315              | +   | -  | +             | +               | IOL          | PPV                  |
| male   | 42  | left       | 1                  | -                  | 0.22184875      | -0.22184875               | 627.8   | -353.6            | +   | +  | +             | +               | clear        | -                    |
| female | 73  | right      | 1                  | -                  | 0.522878745     | -0.124938737              | 483     | -256              | +   | -  | +             | -               | IOL          | -                    |
| male   | 72  | left       | 2                  | -                  | 0.15490196      | -0.109144469              | 426     | -179              | +   | +  | +             | +               | IOL          | -                    |
| male   | 71  | right      | 3                  | -                  | 0.698970004     | -0.176091259              | 577     | -12               | +   | -  | -             | -               | IOL          | -                    |
| male   | 71  | left       | 5                  | -                  | 0.397940009     | -0.176091259              | 589     | -233              | +   | +  | -             | -               | IOL          | -                    |
| male   | 67  | left       | 6                  | IVR 2 times        | 0.698970004     | -0.301029996              | 480     | -148              | -   | -  | +             | +               | IOL          | -                    |
| female | 64  | right      | 1                  | IVR 4 times        | 0.823908741     | -0.124938737              | 446     | -24               | -   | -  | +             | +               | cat          | -                    |
| female | 65  | left       | 3                  | IVB 1 time         | 0.22184875      | -0.176091259              | 388     | 74                | -   | +  | -             | +               | IOL          | -                    |

|        |    |       |   |                                |              |              |     |       |   |   |   |   |       |    |
|--------|----|-------|---|--------------------------------|--------------|--------------|-----|-------|---|---|---|---|-------|----|
| female | 70 | right | 4 | IVB 1 time                     | 0.301029996  | 0            | 346 | -11   | - | + | + | + | cat   | -  |
| female | 54 | right | 3 | IVR 1 time                     | 0.096910013  | -0.096910013 | 263 | 158.8 | - | + | + | + | cat   | -  |
| male   | 73 | left  | 3 | IVR 1 time                     | 0.096910013  | -0.096910013 | 448 | -22   | - | + | - | + | IOL   | -  |
| male   | 42 | right | 8 | IVR 7 times                    | -0.079181246 | 0            | 358 | 59    | - | + | - | + | clear | -  |
| male   | 83 | right | 2 | IVR 3 times                    | 0.698970004  | 0            | 678 | -52   | - | - | + | + | IOL   | -  |
| male   | 81 | right | 1 | IVR 1 time                     | 0.301029996  | 0.096910013  | 401 | -96.2 | - | + | + | - | IOL   | -  |
| female | 68 | right | 6 | IVR 3 times                    | 0.301029996  | -0.380211242 | 419 | -121  | - | + | + | + | cat   | -  |
| female | 62 | right | 8 | IVR 4 times                    | 0            | -0.079181246 | 607 | -281  | - | + | - | + | cat   | -  |
| female | 62 | left  | 7 | IVR 3 times                    | 0.15490196   | 0.06694679   | 436 | -187  | - | + | - | + | cat   | -  |
| male   | 76 | left  | 6 | IVR 5 times                    | 0.301029996  | -0.146128036 | 642 | -107  | - | + | + | + | IOL   | -  |
| male   | 61 | left  | 5 | IVR 2 times                    | 0.522878745  | -0.22184875  | 472 | -122  | - | - | + | + | cat   | -  |
| male   | 54 | right | 5 | IVB/IVR<br>1 time respectively | 0.301029996  | 0.397940009  | 540 | -163  | - | - | + | + | cat   | -  |
| male   | 68 | right | 3 | IVR 3 times                    | 0.301029996  | 0.096910013  | 546 | 17    | - | + | + | + | cat   | -  |
| male   | 56 | right | 3 | IVR 1 times                    | 0.397940009  | -0.301029996 | 485 | -93   | - | + | - | + | cat   | -  |
| male   | 64 | left  | 5 | -                              | 0.22184875   | 0            | 433 | -50   | - | - | + | - | IOL   | PC |
| male   | 83 | left  | 4 | -                              | 0.522878745  | 0.176091259  | 531 | 22    | - | - | + | + | IOL   | -  |
| female | 65 | left  | 1 | -                              | 0.045757491  | -0.045757491 | 436 | -141  | - | + | - | - | IOL   | -  |
| male   | 56 | left  | 7 | -                              | 0.15490196   | 0.06694679   | 494 | -130  | - | + | + | + | IOL   | -  |
| female | 76 | right | 4 | -                              | 0.823908741  | -0.124938737 | 320 | 22    | - | - | + | + | IOL   | PC |

|        |    |       |   |   |             |              |     |      |   |   |   |   |     |             |
|--------|----|-------|---|---|-------------|--------------|-----|------|---|---|---|---|-----|-------------|
| male   | 69 | left  | 1 | - | 0.698970004 | -0.176091259 | 587 | -296 | - | + | + | + | cat | -           |
| female | 69 | right | 3 | - | 0.397940009 | -0.176091259 | 376 | -75  | - | + | - | - | cat | -           |
| female | 58 | left  | 3 | - | 0.301029996 | -0.146128036 | 592 | -245 | - | + | - | + | cat | -           |
| female | 69 | left  | 5 | - | 0.522878745 | 0            | 477 | -232 | - | - | + | + | cat | -           |
| male   | 44 | right | 4 | - | 0           | 0            | 384 | -71  | - | + | - | - | cat | STTA and PC |
| male   | 44 | left  | 4 | - | 0.15490196  | 0.243038049  | 568 | -174 | - | + | - | - | cat | STTA and PC |
| female | 73 | right | 3 | - | 0.823908741 | 0            | 421 | -45  | - | - | + | + | cat | -           |
| male   | 68 | left  | 3 | - | 0.096910013 | 0.204119983  | 562 | -88  | - | - | + | - | cat | -           |
| female | 78 | left  | 1 | - | 0.397940009 | 0.124938737  | 486 | -80  | - | - | + | + | IOL | -           |
| female | 58 | right | 4 | - | 0.15490196  | -0.109144469 | 339 | 1    | - | + | - | + | cat | -           |
| male   | 75 | right | 2 | - | 0.22184875  | -0.124938737 | 415 | 46   | - | + | - | + | IOL | -           |
| female | 72 | right | 1 | - | 0.22184875  | -0.22184875  | 417 | -100 | - | + | + | - | IOL | -           |
| male   | 75 | left  | 1 | - | 0           | 0            | 450 | -76  | - | + | + | - | IOL | -           |

**Supplemental Table. A list of all cases in this study.**

Abbreviations: IVA, intravitreal aflibercept injection; IVR, intravitreal ranibizumab injection; IVB, intravitreal bevacizumab injection, BCVA, best-corrected visual acuity; CMT, central macular thickness; SRD, serous retinal detachment; EZ, ellipsoid zone, PC, photocoagulation; STTA, sub-Tenon's triamcinolone acetonide; cat, cataract; PPV, pars plana vitrectomy; IOL, intraocular lens.
